# Supplementary material for: What can we learn about urban air quality with regard to the first outbreak of the COVID-19 pandemic? A case study from Central Europe
Source: Copernicus journal article supplement (doi:10.5194/acp-2020-997), 2020-10-09
Supplement: Supplementary file 1 [file acp-2020-997-supplement.pdf]

1 **What can we learn about urban air quality**  
2 **with regard to the first outbreak of the COVID-19 pandemic?**  
3 **A case study from Central Europe**

4 Imre SALMA<sup>1</sup>, Máté VÖRÖSMARTY<sup>1</sup>, András Zénó GYÖNGYÖSI<sup>1</sup>, Wanda THÉN<sup>2</sup>,  
5 Tamás WEIDINGER<sup>3</sup>

6 <sup>1</sup> Institute of Chemistry, Eötvös University, Budapest, Hungary

7 <sup>2</sup> Hevesy György Ph. D. School of Chemistry, Eötvös University, Budapest, Hungary

8 <sup>3</sup> Department of Meteorology, Eötvös University, Budapest, Hungary

9 Correspondence to: Imre Salma (salma@chem.elte.hu)

10

11 **Table S1.** Macrocirculation patterns and their seasonal and annual occurrences in the Carpathian Basin  
12 for years 1958–2010 (Maheras et al., 2018).

13

| No. | Code | Description                                                    | Occurrence frequency (%) |        |        |        |        |
|-----|------|----------------------------------------------------------------|--------------------------|--------|--------|--------|--------|
|     |      |                                                                | Winter                   | Spring | Summer | Autumn | Annual |
| 1   | mCc  | Cyclone with a cold front over NE Europe, N wind               | 7.3                      | 11.3   | 12.1   | 8.0    | 9.7    |
| 2   | AB   | Anticyclone over the British Isles, N wind                     | 5.6                      | 7.1    | 8.6    | 6.4    | 6.9    |
| 3   | CMc  | Mediterranean cyclone with a cold front over S Europe, N wind  | 2.5                      | 3.5    | 1.8    | 1.9    | 2.4    |
| 4   | mCw  | Mediterranean cyclone with a warm front over NE Europe, S wind | 9.2                      | 9.7    | 5.7    | 7.2    | 7.9    |
| 5   | Ae   | Anticyclone over E Europe, S wind                              | 14.2                     | 11.3   | 7.3    | 17.6   | 12.6   |
| 6   | CMw  | Mediterranean cyclone with a warm front over S Europe, S wind  | 8.9                      | 8.7    | 3.7    | 8.3    | 7.4    |
| 7   | zC   | Highly developed cyclone over N Europe, W wind                 | 5.0                      | 3.2    | 2.7    | 2.9    | 3.5    |
| 8   | Aw   | Anticyclone over W Europe, W wind                              | 13.1                     | 11.2   | 20.8   | 12.8   | 14.6   |
| 9   | As   | Anticyclone over S Europe, W wind                              | 7.0                      | 4.4    | 2.9    | 5.6    | 4.9    |
| 10  | An   | Anticyclone over N Europe, E wind                              | 10.9                     | 12.8   | 11.3   | 10.1   | 11.3   |
| 11  | AF   | Anticyclone over Fennoscandia, E wind                          | 2.8                      | 5.2    | 5.9    | 3.7    | 4.4    |
| 12  | A    | Anticyclone over the Carpathian Basin, changing wind direction | 11.8                     | 7.3    | 13.3   | 13.3   | 11.4   |
| 13  | C    | Cyclone over the Carpathian Basin, changing wind direction     | 1.7                      | 4.3    | 3.9    | 2.2    | 3.0    |

14

|    | Pandemic phase            | Date (dd-MM) | Day of week | Heating info              | MCP code | Precipitation | Pandemic phase     | Date (dd-MM) | Day of week | Heating info            | MCP code | Precipitation | Pandemic phase          | Date (dd-MM) | Day of week | Heating info                | MCP code | Precipitation |  |
|----|---------------------------|--------------|-------------|---------------------------|----------|---------------|--------------------|--------------|-------------|-------------------------|----------|---------------|-------------------------|--------------|-------------|-----------------------------|----------|---------------|--|
| 15 |                           |              |             |                           |          |               |                    |              |             |                         |          |               |                         |              |             |                             |          |               |  |
| 16 | Pre-emergency (71 d)      | 01-01        | Wed         | Heating season (106 days) | 8        | 0             | Restriction (51 d) | 12-03        | Thu         | Heating season (cont'd) | 7        | 0             | Post-restriction (31 d) | 18-05        | Mon         | Non-heating season (cont'd) | 8        | 0             |  |
| 17 |                           | 02-01        | Thu         |                           | 9        | 0             |                    | 13-03        | Fri         |                         | 7        | 0             |                         | 19-05        | Tue         |                             | 6        | 0             |  |
| 18 |                           | 03-01        | Fri         |                           | 12       | 0             |                    | 14-03        | Sat         |                         | 8        | 0             |                         | 20-05        | Wed         |                             | 1        | 1             |  |
| 19 |                           | 04-01        | Sat         |                           | 1        | 1             |                    | 15-03        | Sun         |                         | 12       | 0             |                         | 21-05        | Thu         |                             | 11       | 0             |  |
| 20 |                           | 05-01        | Sun         |                           | 8        | 0             |                    | 16-03        | Mon         |                         | 5        | 0             |                         | 22-05        | Fri         |                             | 11       | 0             |  |
| 21 |                           | 06-01        | Mon         |                           | 12       | 0             |                    | 17-03        | Tue         |                         | 5        | 0             |                         | 23-05        | Sat         |                             | 4        | 1             |  |
| 22 |                           | 07-01        | Tue         |                           | 12       | 0             |                    | 18-03        | Wed         |                         | 12       | 0             |                         | 24-05        | Sun         |                             | 4        | 0             |  |
| 23 |                           | 08-01        | Wed         |                           | 12       | 0             |                    | 19-03        | Thu         |                         | 12       | 0             |                         | 25-05        | Mon         |                             | 2        | 1             |  |
| 24 |                           | 09-01        | Thu         |                           | 12       | 0             |                    | 20-03        | Fri         |                         | 12       | 0             |                         | 26-05        | Tue         |                             | 2        | 0             |  |
| 25 |                           | 10-01        | Fri         |                           | 9        | 0             |                    | 21-03        | Sat         |                         | 5        | 1             |                         | 27-05        | Wed         |                             | 2        | 3             |  |
| 26 |                           | 11-01        | Sat         |                           | 8        | 0             |                    | 22-03        | Sun         |                         | 2        | 0             |                         | 28-05        | Thu         |                             | 2        | 1             |  |
| 27 |                           | 12-01        | Sun         |                           | 12       | 0             |                    | 23-03        | Mon         |                         | 10       | 1             |                         | 29-05        | Fri         |                             | 11       | 1             |  |
| 28 |                           | 13-01        | Mon         |                           | 12       | 0             |                    | 24-03        | Tue         |                         | 10       | 0             |                         | 30-05        | Sat         |                             | 11       | 1             |  |
| 29 |                           | 14-01        | Tue         |                           | 12       | 0             |                    | 25-03        | Wed         |                         | 10       | 0             |                         | 31-05        | Sun         |                             | 11       | 2             |  |
| 30 |                           | 15-01        | Wed         |                           | 5        | 0             |                    | 26-03        | Thu         |                         | 10       | 0             |                         | 01-06        | Mon         |                             | 11       | 0             |  |
| 31 |                           | 16-01        | Thu         |                           | 5        | 0             |                    | 27-03        | Fri         |                         | 10       | 0             |                         | 02-06        | Tue         |                             | 11       | 0             |  |
| 32 |                           | 17-01        | Fri         |                           | 12       | 0             |                    | 28-03        | Sat         |                         | 5        | 0             |                         | 03-06        | Wed         |                             | 4        | 0             |  |
| 33 |                           | 18-01        | Sat         |                           | 5        | 0             |                    | 29-03        | Sun         |                         | 2        | 0             |                         | 04-06        | Thu         |                             | 1        | 0             |  |
| 34 |                           | 19-01        | Sun         |                           | 2        | 0             |                    | 30-03        | Mon         |                         | 2        | 0             |                         | 05-06        | Fri         |                             | 1        | 5             |  |
| 35 |                           | 20-01        | Mon         |                           | 2        | 0             |                    | 31-03        | Tue         |                         | 2        | 0             |                         | 06-06        | Sat         |                             | 1        | 0             |  |
| 36 |                           | 21-01        | Tue         |                           | 2        | 0             |                    | 01-04        | Wed         |                         | 2        | 0             |                         | 07-06        | Sun         |                             | 1        | 11            |  |
| 37 |                           | 22-01        | Wed         |                           | 2        | 0             |                    | 02-04        | Thu         |                         | 12       | 0             |                         | 08-06        | Mon         |                             | 1        | 0             |  |
| 38 |                           | 23-01        | Thu         |                           | 2        | 0             |                    | 03-04        | Fri         |                         | 12       | 0             |                         | 09-06        | Tue         |                             | 1        | 7             |  |
| 39 |                           | 24-01        | Fri         |                           | 9        | 0             |                    | 04-04        | Sat         |                         | 10       | 0             |                         | 10-06        | Wed         |                             | 13       | 4             |  |
| 40 |                           | 25-01        | Sat         |                           | 9        | 0             |                    | 05-04        | Sun         |                         | 10       | 0             |                         | 11-06        | Thu         |                             | 13       | 0             |  |
| 41 |                           | 26-01        | Sun         |                           | 12       | 0             |                    | 06-04        | Mon         |                         | 5        | 0             |                         | 12-06        | Fri         |                             | 13       | 0             |  |
| 42 |                           | 27-01        | Mon         |                           | 9        | 0             |                    | 07-04        | Tue         |                         | 5        | 0             |                         | 13-06        | Sat         |                             | 4        | 2             |  |
| 43 |                           | 28-01        | Tue         |                           | 1        | 8             |                    | 08-04        | Wed         |                         | 12       | 0             |                         | 14-06        | Sun         |                             | 4        | 24            |  |
| 44 |                           | 29-01        | Wed         |                           | 1        | 1             |                    | 09-04        | Thu         |                         | 12       | 0             |                         | 15-06        | Mon         |                             | 1        | 26            |  |
| 45 |                           | 30-01        | Thu         |                           | 13       | 0             |                    | 10-04        | Fri         |                         | 2        | 0             |                         | 16-06        | Tue         |                             | 4        | 4             |  |
| 46 |                           | 31-01        | Fri         |                           | 4        | 1             |                    | 11-04        | Sat         |                         | 10       | 0             |                         | 17-06        | Wed         |                             | 4        | 13            |  |
| 47 | 01-02                     | Sat          | 7           | 1                         | 12-04    | Sun           | 5                  | 0            | 18-06       | Thu                     | 4        | 5             |                         |              |             |                             |          |               |  |
| 48 | 02-02                     | Sun          | 7           | 2                         | 13-04    | Mon           | 5                  | 0            | 19-06       | Fri                     | 1        | 0             |                         |              |             |                             |          |               |  |
| 49 | 03-02                     | Mon          | 7           | 1                         | 14-04    | Tue           | 1                  | 0            | 20-06       | Sat                     | 8        | 0             |                         |              |             |                             |          |               |  |
| 50 | 04-02                     | Tue          | 13          | 6                         | 15-04    | Wed           | 2                  | 0            | 21-06       | Sun                     | 8        | 1             |                         |              |             |                             |          |               |  |
| 51 | 05-02                     | Wed          | 6           | 0                         | 16-04    | Thu           | 9                  | 0            | 22-06       | Mon                     | 8        | 0             |                         |              |             |                             |          |               |  |
|    | 06-02                     | Thu          | 2           | 0                         | 17-04    | Fri           | 9                  | 0            | 23-06       | Tue                     | 8        | 0             |                         |              |             |                             |          |               |  |
|    | 07-02                     | Fri          | 10          | 0                         | 18-04    | Sat           | 11                 | 0            | 24-06       | Wed                     | 11       | 0             |                         |              |             |                             |          |               |  |
|    | 08-02                     | Sat          | 12          | 0                         | 19-04    | Sun           | 13                 | 0            | 25-06       | Thu                     | 11       | 0             |                         |              |             |                             |          |               |  |
|    | 09-02                     | Sun          | 9           | 0                         | 20-04    | Mon           | 11                 | 0            | 26-06       | Fri                     | 10       | 1             |                         |              |             |                             |          |               |  |
|    | 10-02                     | Mon          | 1           | 5                         | 21-04    | Tue           | 11                 | 0            | 27-06       | Sat                     | 5        | 0             |                         |              |             |                             |          |               |  |
|    | 11-02                     | Tue          | 13          | 0                         | 22-04    | Wed           | 11                 | 0            | 28-06       | Sun                     | 12       | 0             |                         |              |             |                             |          |               |  |
|    | 12-02                     | Wed          | 8           | 0                         | 23-04    | Thu           | 11                 | 0            | 29-06       | Mon                     | 1        | 6             |                         |              |             |                             |          |               |  |
|    | 13-02                     | Thu          | 9           | 2                         | 24-04    | Fri           | 12                 | 0            | 30-06       | Tue                     | 8        | 0             |                         |              |             |                             |          |               |  |
|    | 14-02                     | Fri          | 1           | 0                         | 25-04    | Sat           | 1                  | 0            | 01-07       | Wed                     | 9        | 0             |                         |              |             |                             |          |               |  |
|    | 15-02                     | Sat          | 12          | 0                         | 26-04    | Sun           | 1                  | 0            | 02-07       | Thu                     | 1        | 2             |                         |              |             |                             |          |               |  |
|    | 16-02                     | Sun          | 5           | 0                         | 27-04    | Mon           | 1                  | 0            | 03-07       | Fri                     | 1        | 0             |                         |              |             |                             |          |               |  |
|    | 17-02                     | Mon          | 5           | 0                         | 28-04    | Tue           | 1                  | 0            | 04-07       | Sat                     | 8        | 0             |                         |              |             |                             |          |               |  |
|    | 18-02                     | Tue          | 7           | 0                         | 29-04    | Wed           | 1                  | 3            | 05-07       | Sun                     | 8        | 0             |                         |              |             |                             |          |               |  |
|    | 19-02                     | Wed          | 4           | 1                         | 30-04    | Thu           | 4                  | 4            | 06-07       | Mon                     | 8        | 7             |                         |              |             |                             |          |               |  |
|    | 20-02                     | Thu          | 4           | 0                         | 01-05    | Fri           | 1                  | 1            | 07-07       | Tue                     | 8        | 0             |                         |              |             |                             |          |               |  |
|    | 21-02                     | Fri          | 5           | 0                         | 02-05    | Sat           | 1                  | 0            | 08-07       | Wed                     | 8        | 0             |                         |              |             |                             |          |               |  |
|    | 22-02                     | Sat          | 8           | 0                         | 03-05    | Sun           | 1                  | 0            | 09-07       | Thu                     | 12       | 0             |                         |              |             |                             |          |               |  |
|    | 23-02                     | Sun          | 7           | 0                         | 04-05    | Mon           | 4                  | 0            | 10-07       | Fri                     | 12       | 0             |                         |              |             |                             |          |               |  |
|    | 24-02                     | Mon          | 1           | 0                         | 05-05    | Tue           | 13                 | 0            | 11-07       | Sat                     | 1        | 7             |                         |              |             |                             |          |               |  |
|    | 25-02                     | Tue          | 4           | 2                         | 06-05    | Wed           | 1                  | 0            | 12-07       | Sun                     | 8        | 0             |                         |              |             |                             |          |               |  |
|    | 26-02                     | Wed          | 1           | 6                         | 07-05    | Thu           | 2                  | 0            | 13-07       | Mon                     | 8        | 0             |                         |              |             |                             |          |               |  |
|    | 27-02                     | Thu          | 1           | 1                         | 08-05    | Fri           | 12                 | 0            | 14-07       | Tue                     | 12       | 0             |                         |              |             |                             |          |               |  |
|    | 28-02                     | Fri          | 13          | 2                         | 09-05    | Sat           | 9                  | 0            | 15-07       | Wed                     | 12       | 0             |                         |              |             |                             |          |               |  |
|    | 29-02                     | Sat          | 9           | 0                         | 10-05    | Sun           | 1                  | 0            | 16-07       | Thu                     | 1        | 0             |                         |              |             |                             |          |               |  |
|    | 01-03                     | Sun          | 1           | 17                        | 11-05    | Mon           | 6                  | 0            | 17-07       | Fri                     | 1        | 2             |                         |              |             |                             |          |               |  |
|    | 02-03                     | Mon          | 13          | 2                         | 12-05    | Tue           | 1                  | 1            | 18-07       | Sat                     | 1        | 1             |                         |              |             |                             |          |               |  |
|    | 03-03                     | Tue          | 13          | 4                         | 13-05    | Wed           | 1                  | 0            | 19-07       | Sun                     | 10       | 7             |                         |              |             |                             |          |               |  |
|    | 04-03                     | Wed          | 13          | 0                         | 14-05    | Thu           | 13                 | 0            | 20-07       | Mon                     | 1        | 0             |                         |              |             |                             |          |               |  |
|    | 05-03                     | Thu          | 12          | 2                         | 15-05    | Fri           | 13                 | 0            | 21-07       | Tue                     | 1        | 1             |                         |              |             |                             |          |               |  |
|    | 06-03                     | Fri          | 13          | 11                        | 16-05    | Sat           | 2                  | 2            | 22-07       | Wed                     | 1        | 0             |                         |              |             |                             |          |               |  |
|    | 07-03                     | Sat          | 13          | 0                         | 17-05    | Sun           | 2                  | 3            | 23-07       | Thu                     | 1        | 1             |                         |              |             |                             |          |               |  |
|    | 08-03                     | Sun          | 8           | 0                         |          |               |                    |              | 24-07       | Fri                     | 10       | 17            |                         |              |             |                             |          |               |  |
|    | 09-03                     | Mon          | 6           | 0                         |          |               |                    |              | 25-07       | Sat                     | 13       | 0             |                         |              |             |                             |          |               |  |
|    | 10-03                     | Tue          | 6           | 1                         |          |               |                    |              | 26-07       | Sun                     | 1        | 2             |                         |              |             |                             |          |               |  |
|    | 11-03                     | Wed          | 7           | 0                         |          |               |                    |              | 27-07       | Mon                     | 1        | 0             |                         |              |             |                             |          |               |  |
|    |                           |              |             |                           |          |               |                    |              | 28-07       | Tue                     | 1        | 0             |                         |              |             |                             |          |               |  |
|    |                           |              |             |                           |          |               |                    |              | 29-07       | Wed                     | 1        | 0             |                         |              |             |                             |          |               |  |
|    |                           |              |             |                           |          |               |                    |              | 30-07       | Thu                     | 8        | 0             |                         |              |             |                             |          |               |  |
|    |                           |              |             |                           |          |               |                    |              | 31-07       | Fri                     | 12       | 0             |                         |              |             |                             |          |               |  |
| 43 | Total number of days: 213 |              |             |                           |          |               |                    |              |             |                         |          |               |                         |              |             |                             |          |               |  |

45 **Figure S1.** Survey on time intervals of interest with basic facts, daily macrocirculation pattern (MCP)
 46 codes and daily precipitation sum (mm) in Budapest from 1 January to 31 July 2020. The holidays are
 47 indicated in darker green, heating season in darker grey, non-heating season in lighter grey, Pre-
 48 emergency phase of the first COVID-19 outbreak in lighter blue, Pre-restriction phase in lighter
 49 yellow, Restriction phase in orange, Post-restriction phase in darker yellow and Post-emergency phase
 50 in darker blue colours. The cyclonic and anticyclonic MCP types are marked in lighter green and pink
 51 colours, respectively.

52 Motor road vehicles traffic was measured by the Budapest Public Roads Ltd., which is  
53 responsible for operation, control and maintenance of all roads, streets, bridges, tunnels, other  
54 structures and traffic engineering facilities in Budapest. The actual locations were 1) Szabadság  
55 Bridge, 2) Váci Road near its junction with Árpád Road, 3) Alkotás Road near its junction with  
56 Nagyenyed Street, 4) Margit Boulevard and Vérmező Street which both lead to Széna Square  
57 (and therefore the site is called here as Széna Square), where the monitoring station for the  
58 criteria air pollutants is located.

59

60 The Szabadság Bridge hosts quite complex events. The bridge was reserved for the pedestrians  
61 and was closed for motor vehicles on some summer weekends, namely on 17–18 June, 24–25  
62 June, 5–6 August and 12–13 August in 2017, on 14–15 July, 21–22 July, 28–29 July and 4–5  
63 August in 2018, on 6–7 July, 13–14 July, 20–21 July and 27–28 July on 2019. It was also  
64 partially or completely closed for vehicles in some other intervals due to urban running races  
65 or for its planned extended cleaning. The vehicle census data for these days and time intervals  
66 were included in deriving the time series of vehicular traffic but were excluded when  
67 calculating the average diurnal patterns and descriptive statistics to avoid their distortion due  
68 to these very specific or unusual circumstances.

69

70 For location no. 3 (Alkotás Road), the data coverage for year 2019 was poor (21%) and,  
71 therefore, this year was excluded from the averaging for the reference year. Similarly, there  
72 were larger scale traffic control arrangements and missing data in larger abundance for the site  
73 no. 4 (Széna Square), and, therefore, year 2019 was only maintained here.

74 **Table S2.** Ranges and medians of hourly mean  $T$  ( $^{\circ}\text{C}$ ), RH (%), absolute humidity (AH, in  $\text{g m}^{-3}$ ), WS  
75 ( $\text{m s}^{-1}$ ), GRad ( $\text{W m}^{-2}$ , for individual data  $\geq 50 \text{ W m}^{-2}$ ), daily maximum planetary boundary layer height  
76 ( $\text{PBLH}_{\text{max}}$ , in km) in the average reference year of 2017–2019 (Y3Ref) and year 2020 (Y2020) together  
77 with their relative difference (RDiff) in % and their anomaly standardised to SD (SAly) for the overall  
78 state of emergency time interval (from 12 March to 17 June).  
79

| Interval/<br>Variable      | Y3Ref |        |     | Y2020 |        |     | RDiff             | SAly             |
|----------------------------|-------|--------|-----|-------|--------|-----|-------------------|------------------|
|                            | Min   | Median | Max | Min   | Median | Max |                   |                  |
| $T$                        | 3.2   | 16     | 30  | -0.4  | 15     | 31  | -0.7 <sup>†</sup> | -0.1             |
| RH                         | 19    | 56     | 92  | 12    | 50     | 100 | -11               | -0.4             |
| AH                         | 2.8   | 7.6    | 17  | 1.2   | 5.9    | 17  | -22               | -0.5             |
| WS                         | 0.3   | 1.7    | 7.0 | 0.2   | 1.6    | 6.5 | -6                | -0.1             |
| GRad                       | 51    | 407    | 913 | 50    | 397    | 977 | -2                | -10 <sup>‡</sup> |
| $\text{PBLH}_{\text{max}}$ | 0.84  | 1.5    | 2.2 | 0.57  | 1.7    | 3.3 | +10               | +0.3             |

80 <sup>†</sup> Y2020–Y3Ref difference in median  $T$ s; in a unit of  $^{\circ}\text{C}$ .

81 <sup>‡</sup> Anomaly not standardised to SD; in a unit of  $\text{W m}^{-2}$ .

82  
83  
84  
85  
86  
87  
88  
89  
90  
91  
92  
93  
94  
95  
96  
97  
98  
99

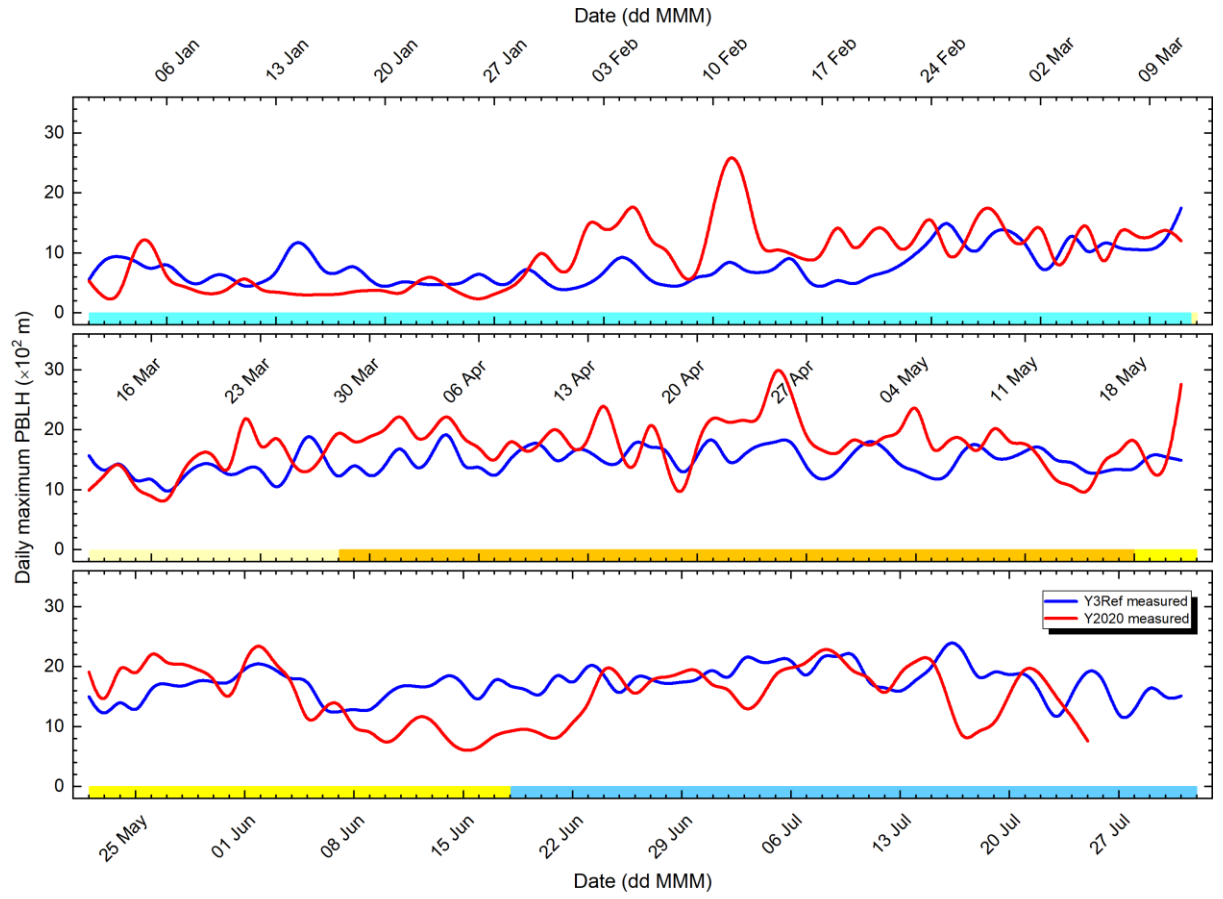

100 **Figure S2.** Time variation of the daily maximum of planetary boundary layer height (PBLH<sub>max</sub>) in the  
101 average reference year of 2017–2019 (Y3Ref) and year 2020 over the five consecutive phases of the  
102 first COVID-19 outbreak. The phases are marked by the following colour codes: Pre-emergency phase  
103 lighter blue, Pre-restriction phase lighter yellow, Restriction phase orange, Post-restriction phase  
104 darker yellow and Post-emergency phase darker blue.

105  
106  
107  
108  
109  
110  
111  
112  
113  
114  
115  
116  
117  
118  
119  
120  
121  
122

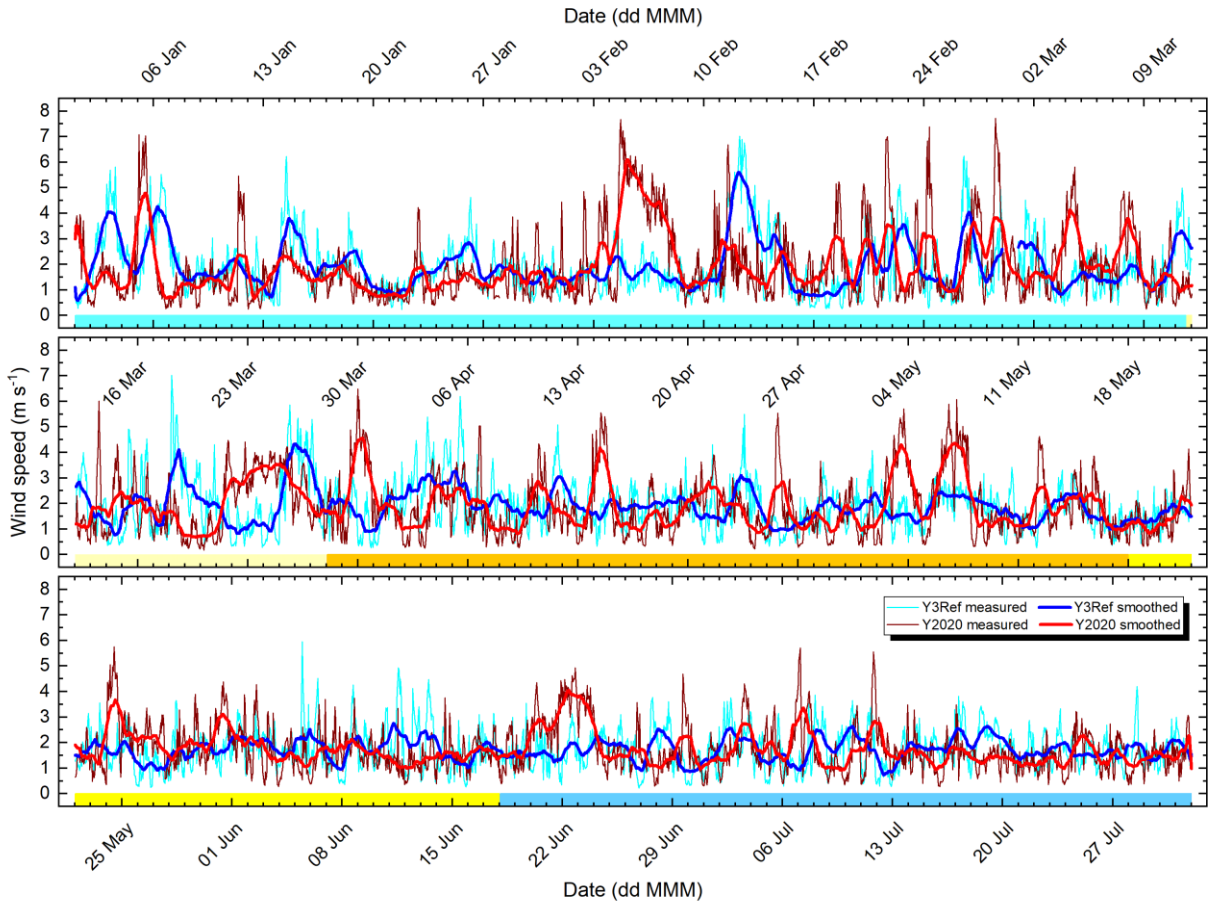

123 **Figure S3.** Time variation of wind speed in the average reference year of 2017–2019 (Y3Ref) and year  
124 2020 together with their 24-h smoothed curves over the five consecutive phases of the first COVID-19  
125 outbreak. The phases are marked by the following colour codes: Pre-emergency phase lighter blue, Pre-  
126 restriction phase lighter yellow, Restriction phase orange, Post-restriction phase darker yellow and Post-  
127 emergency phase darker blue. The tick labels of the abscissa indicate the Mondays in 2020.

128  
129  
130  
131  
132  
133  
134  
135  
136  
137  
138  
139  
140  
141  
142  
143  
144  
145

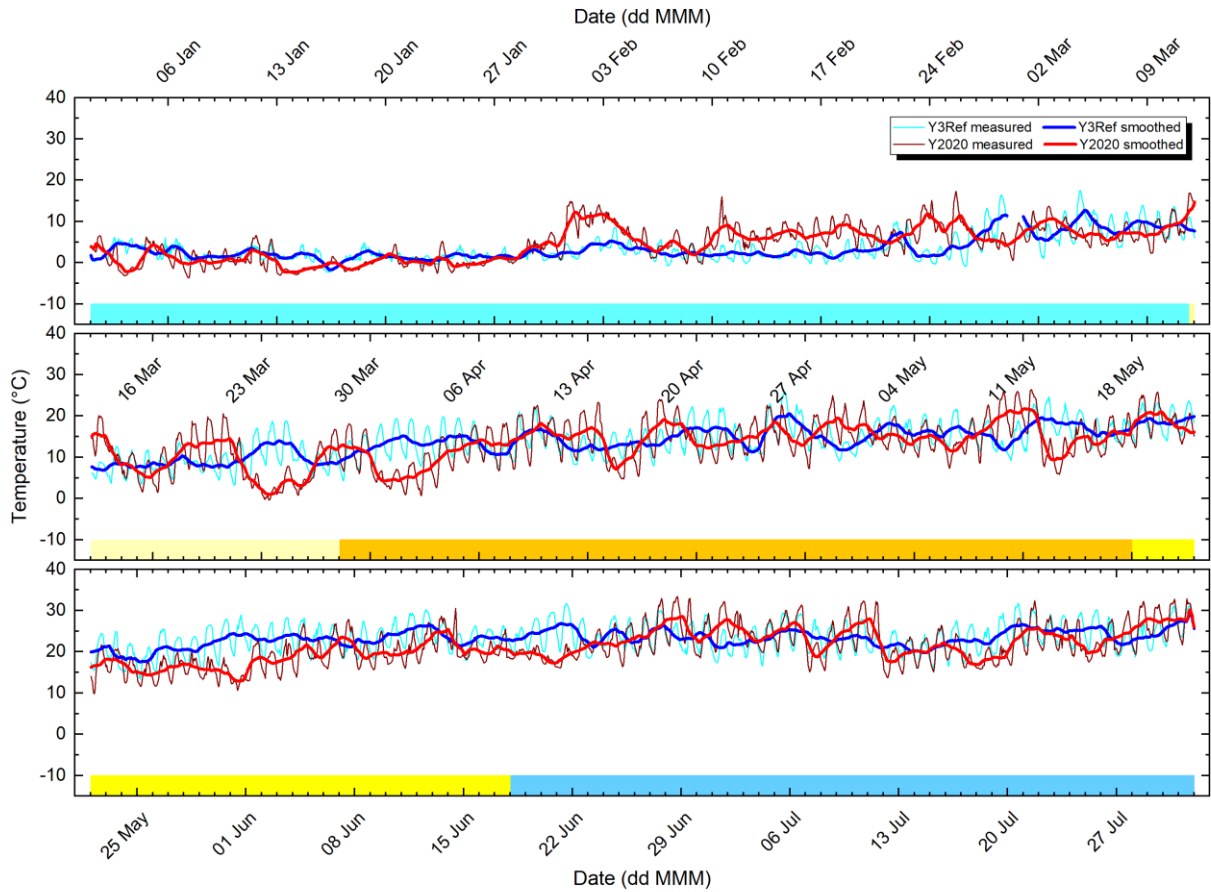

146 **Figure S4.** Time variation of air temperature in the average reference year of 2017–2019 (Y3Ref) and  
147 year 2020 together with their 24-h smoothed curves over the five consecutive phases of the first COVID-  
148 19 outbreak. The phases are marked by the following colour codes: Pre-emergency phase lighter blue,  
149 Pre-restriction phase lighter yellow, Restriction phase orange, Post-restriction phase darker yellow and  
150 Post-emergency phase darker blue. The tick labels of the abscissa indicate the Mondays in 2020.

151  
152  
153  
154  
155  
156  
157  
158  
159  
160  
161  
162  
163  
164  
165  
166  
167  
168  
169  
170  
171  
172  
173  
174  
175  
176

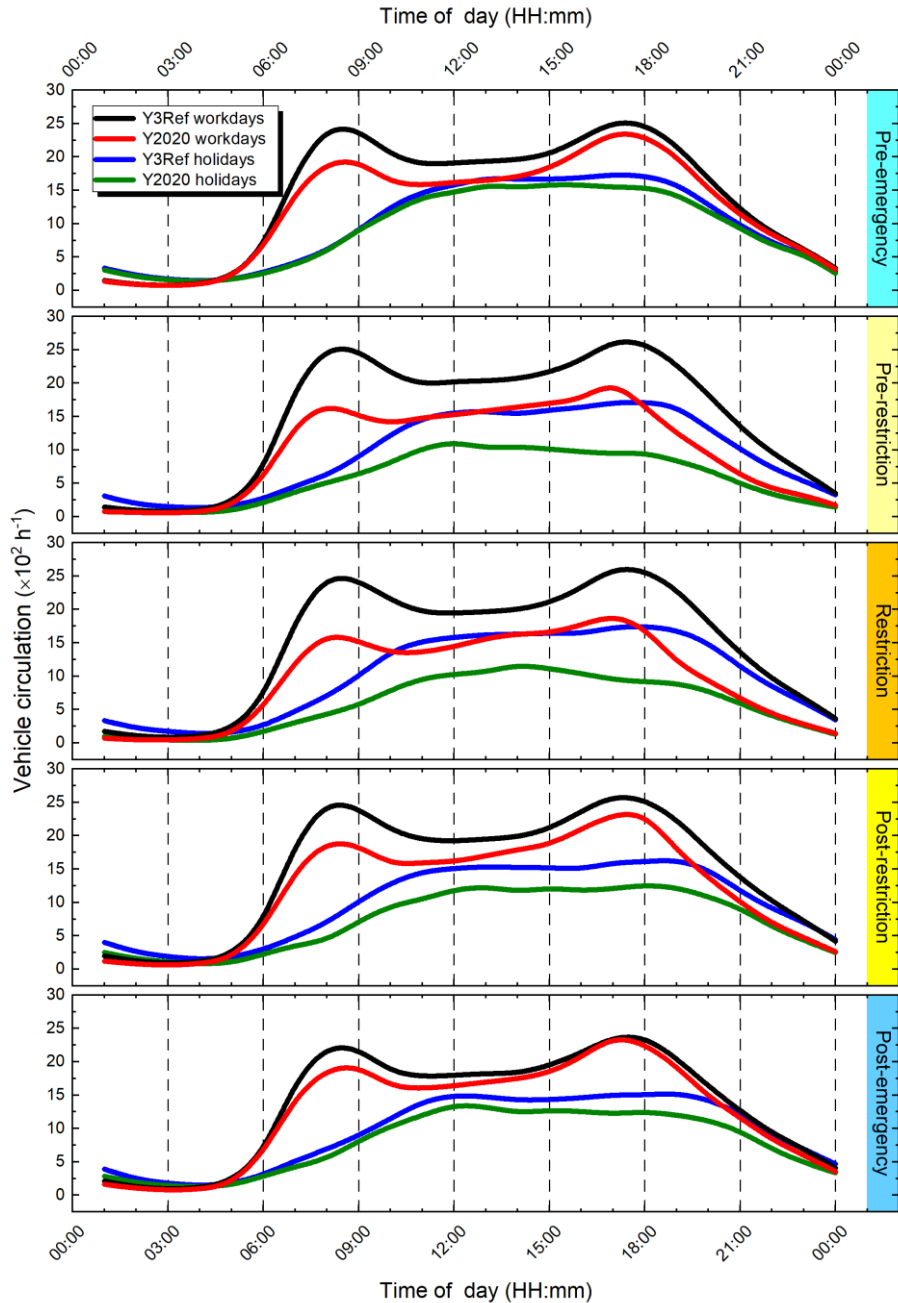

177 **Figure S5.** Average diurnal variations of motor vehicle road traffic in both directions on a major route  
178 (Váci Road) in Budapest separately for workdays and holidays in the average reference year of 2017–  
179 2019 (Y3Ref) and year 2020 over the five consecutive phases of the first COVID-19 outbreak. The  
180 phases are marked by the following colour codes: Pre-emergency phase lighter blue, Pre-restriction  
181 phase lighter yellow, Restriction phase orange, Post-restriction phase darker yellow and Post-  
182 emergency phase darker blue.



183  
184  
185  
186  
187  
188  
189  
190  
191  
192  
193  
194  
195  
196  
197  
198  
199  
200  
201  
202  
203  
204  
205  
206

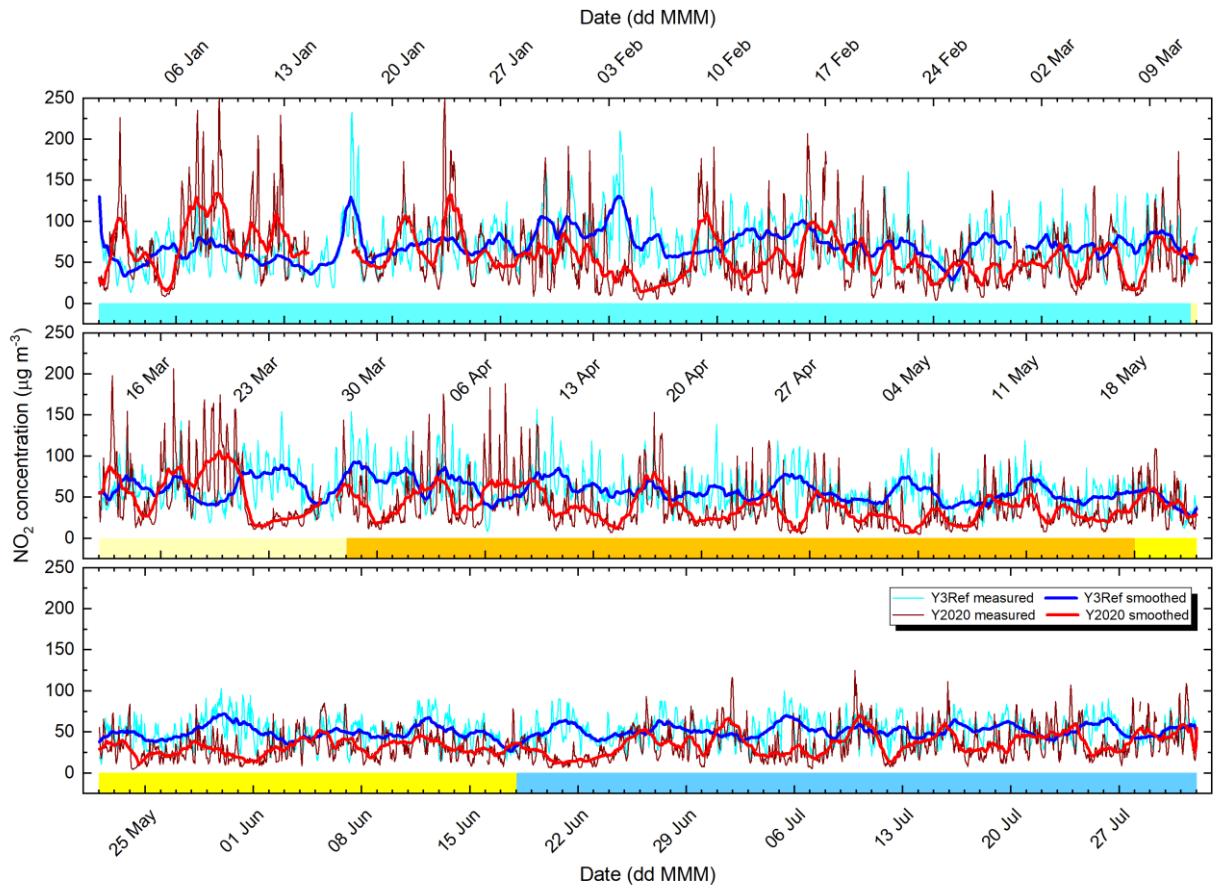

**Figure S6.** Time variation of NO<sub>2</sub> concentration in the average reference year of 2017–2019 (Y3Ref) and year 2020 together with their 24-h smoothed curves over the five consecutive phases of the first COVID-19 outbreak. The phases are marked by the following colour codes: Pre-emergency phase lighter blue, Pre-restriction phase lighter yellow, Restriction phase orange, Post-restriction phase darker yellow and Post-emergency phase darker blue. The tick labels of the abscissa indicate the Mondays in 2020.

207  
208  
209  
210  
211  
212  
213  
214  
215  
216  
217  
218  
219  
220  
221  
222  
223  
224  
225  
226  
227  
228  
229  
230

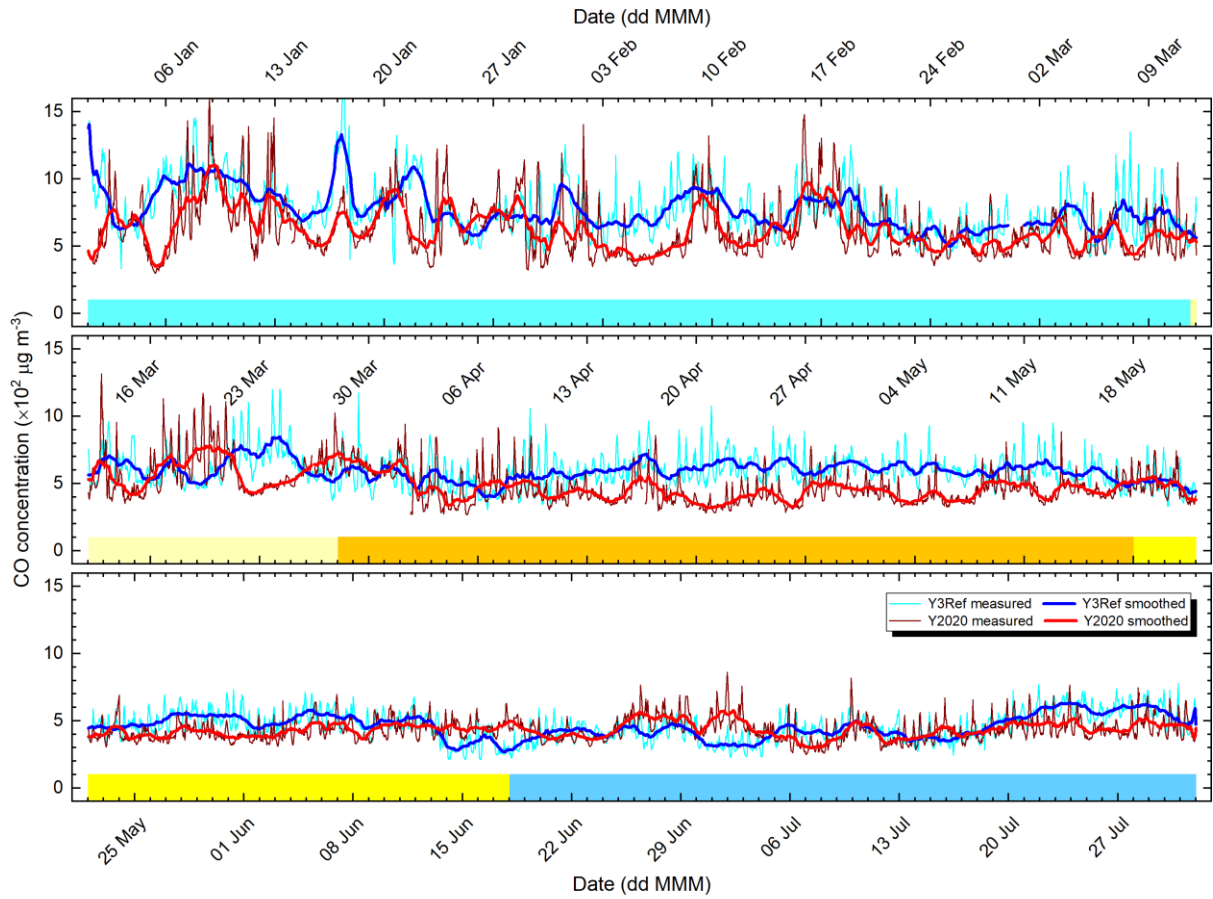

**Figure S7.** Time variation of CO concentration in the average reference year of 2017–2019 (Y3Ref) and year 2020 together with their 24-h smoothed curves over the five consecutive phases of the first COVID-19 outbreak. The phases are marked by the following colour codes: Pre-emergency phase lighter blue, Pre-restriction phase lighter yellow, Restriction phase orange, Post-restriction phase darker yellow and Post-emergency phase darker blue. The tick labels of the abscissa indicate the Mondays in 2020.

231  
232  
233  
234  
235  
236  
237  
238  
239  
240  
241  
242  
243  
244  
245  
246  
247  
248  
249  
250  
251  
252  
253  
254

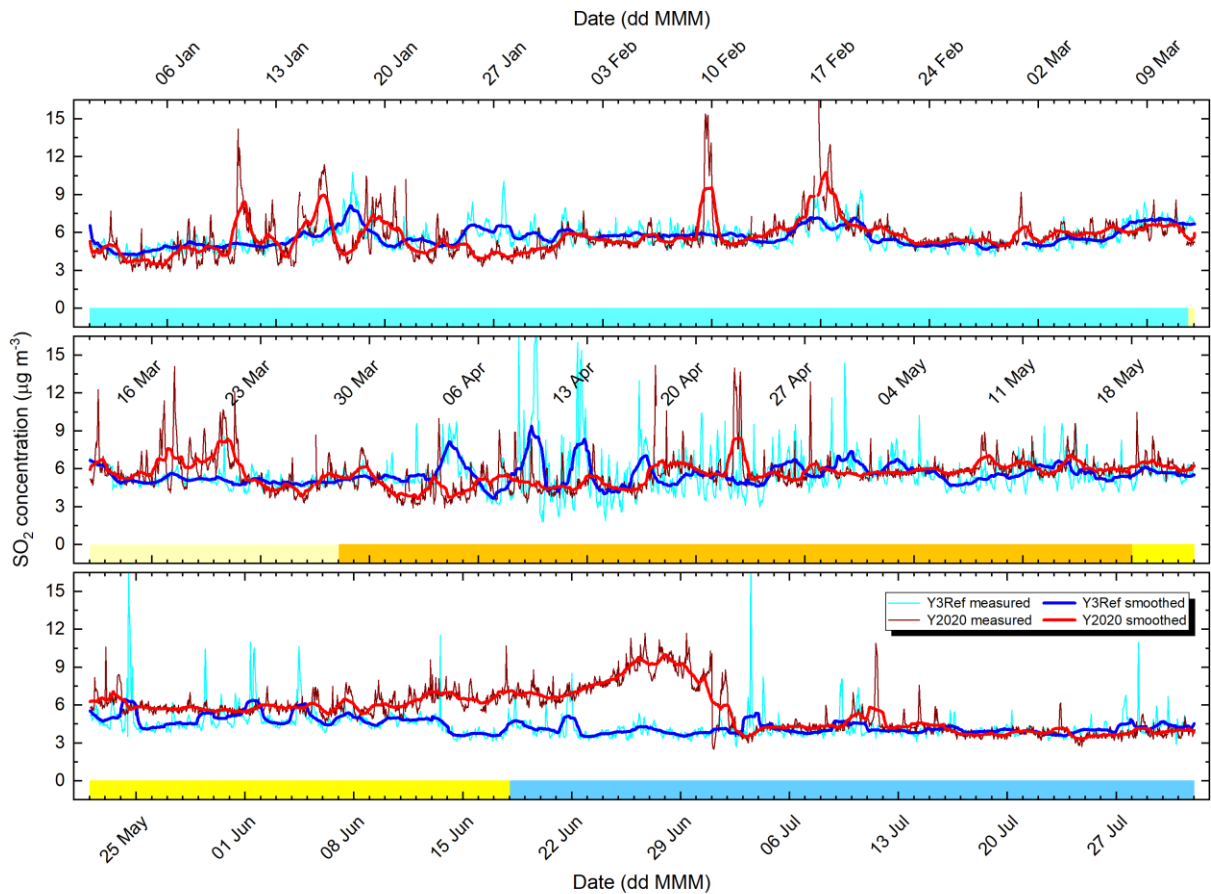

**Figure S8.** Time variation of SO<sub>2</sub> concentration in the average reference year of 2017–2019 (Y3Ref) and year 2020 together with their 24-h smoothed curves over the five consecutive phases of the first COVID-19 outbreak. The phases are marked by the following colour codes: Pre-emergency phase lighter blue, Pre-restriction phase lighter yellow, Restriction phase orange, Post-restriction phase darker yellow and Post-emergency phase darker blue. The tick labels of the abscissa indicate the Mondays in 2020.

255  
256  
257  
258  
259  
260  
261  
262  
263  
264  
265  
266  
267  
268  
269  
270  
271  
272  
273  
274  
275  
276  
277  
278

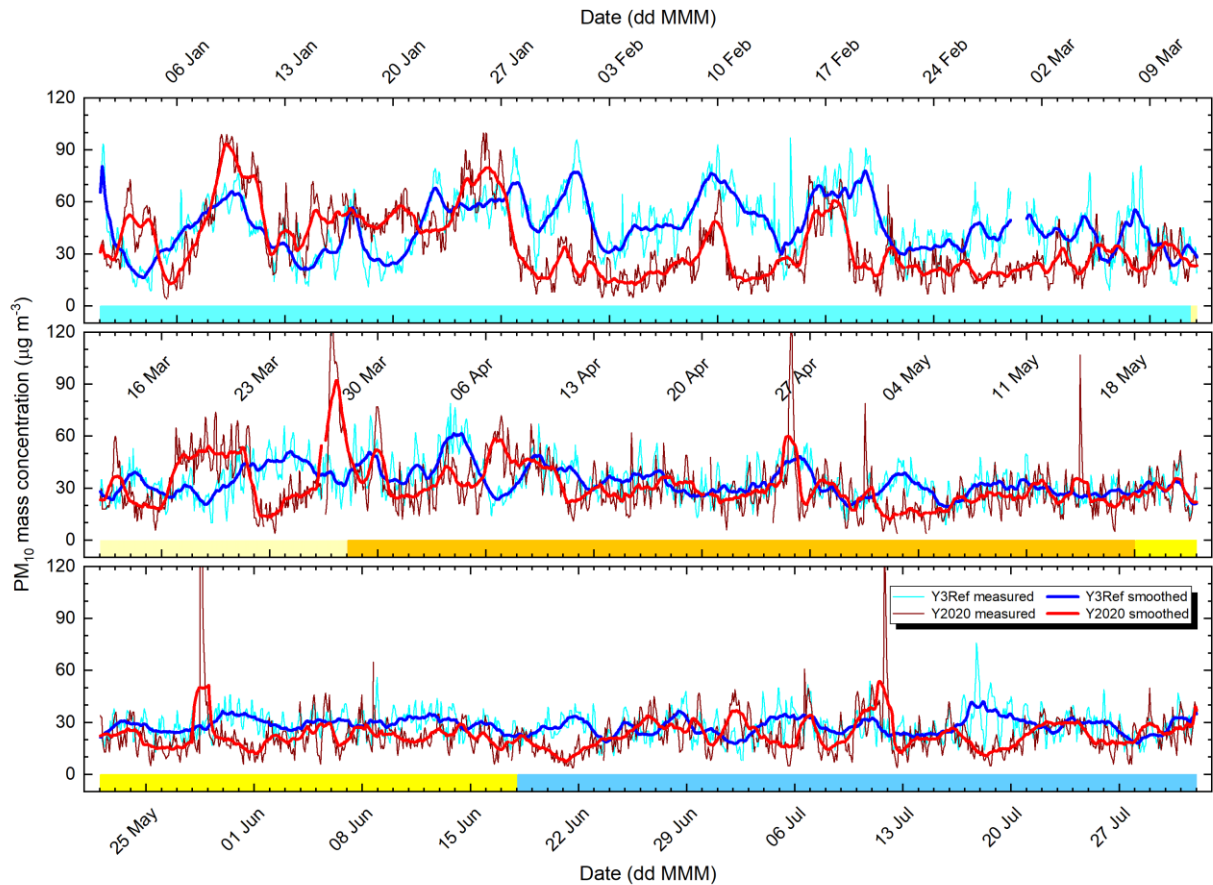

**Figure S9.** Time variation of PM<sub>10</sub> mass concentration in the average reference year of 2017–2019 (Y3Ref) and year 2020 together with their 24-h smoothed curves over the five consecutive phases of the first COVID-19 outbreak. The phases are marked by the following colour codes: Pre-emergency phase lighter blue, Pre-restriction phase lighter yellow, Restriction phase orange, Post-restriction phase darker yellow and Post-emergency phase darker blue. The tick labels of the abscissa indicate the Mondays in 2020.

279  
280  
281  
282  
283  
284  
285  
286  
287  
288  
289  
290  
291  
292  
293  
294  
295  
296

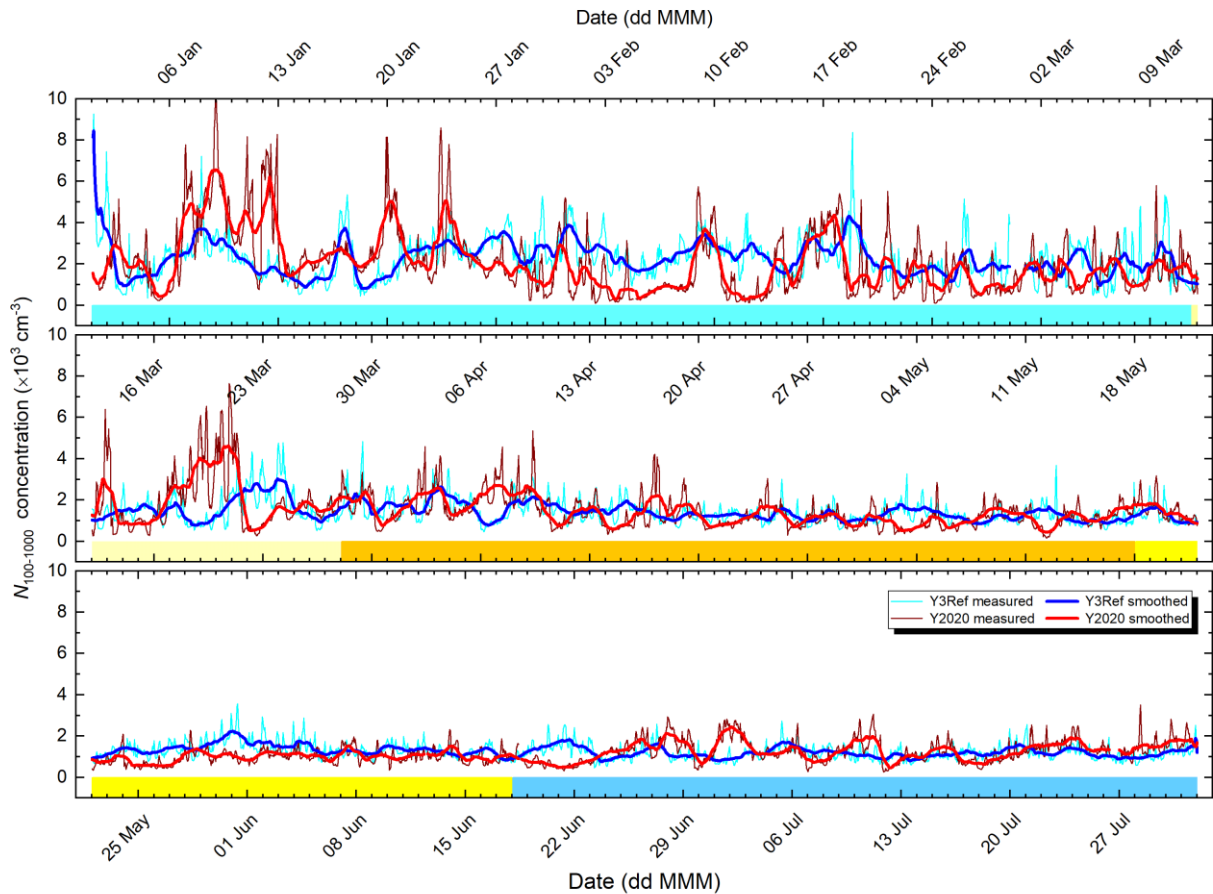

297 **Figure S10.** Time variation of  $N_{100-1000}$  concentration in the average reference year of 2017–2019  
298 (Y3Ref) and year 2020 together with their 24-h smoothed curves over the five consecutive phases of  
299 the first COVID-19 outbreak. The phases are marked by the following colour codes: Pre-emergency  
300 phase lighter blue, Pre-restriction phase lighter yellow, Restriction phase orange, Post-restriction phase  
301 darker yellow and Post-emergency phase darker blue. The tick labels of the abscissa indicate the  
302 Mondays in 2020.

303

304

### 305 Reference

306 Maheras, P., Tolika, K., Tegoulas, I., Anagnostopoulou, Ch., Szpirosz, K., Károssy, Cs., Makra, L.:  
307 Comparison of an automated classification system with an empirical classification of circulation  
308 patterns over the Pannonian basin, Central Europe, Meteorol. Atmos. Phys.,  
309 <https://doi.org/10.1007/s00703-018-0601-x>, 2018.

310
